# Supplementary material for: Cartilage-binding antibodies induce pain through immune complex–mediated activation of neurons
Source: PubMed Central journal article supplement — J Exp Med. 2019 Jun 13;216(8):1904–24. doi: 10.1084/jem.20181657 (PMC6683987; doi:10.1084/jem.20181657), 2019-06-13
Supplement: JEM_20181657_sm.pdf [file JEM_20181657_sm.pdf]

## Supplemental material

Farinotti et al., <https://doi.org/10.1084/jem.20181657>

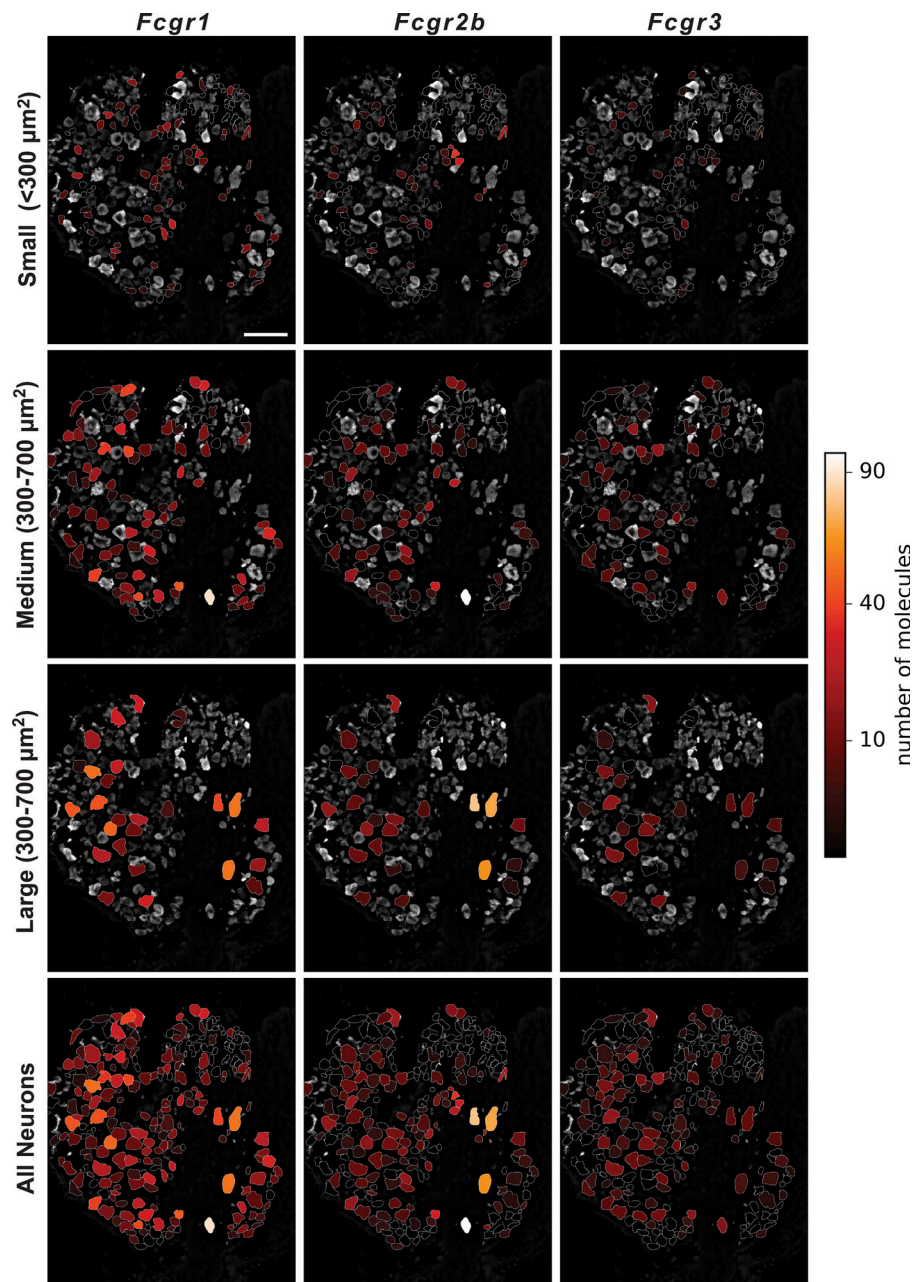

Figure S1. Quantification from smFISH of mRNA molecules of *Fcgr1*, *Fcgr2b*, and *Fcgr3* in mouse DRG. Related to Fig. 4. Scale bar represents 100  $\mu\text{m}$ . *Fcgr1-3* molecules are plotted per individual cell according to neuronal area and showed as intensity of color gradient. *Fcgr1* is shown expressed at the highest level.

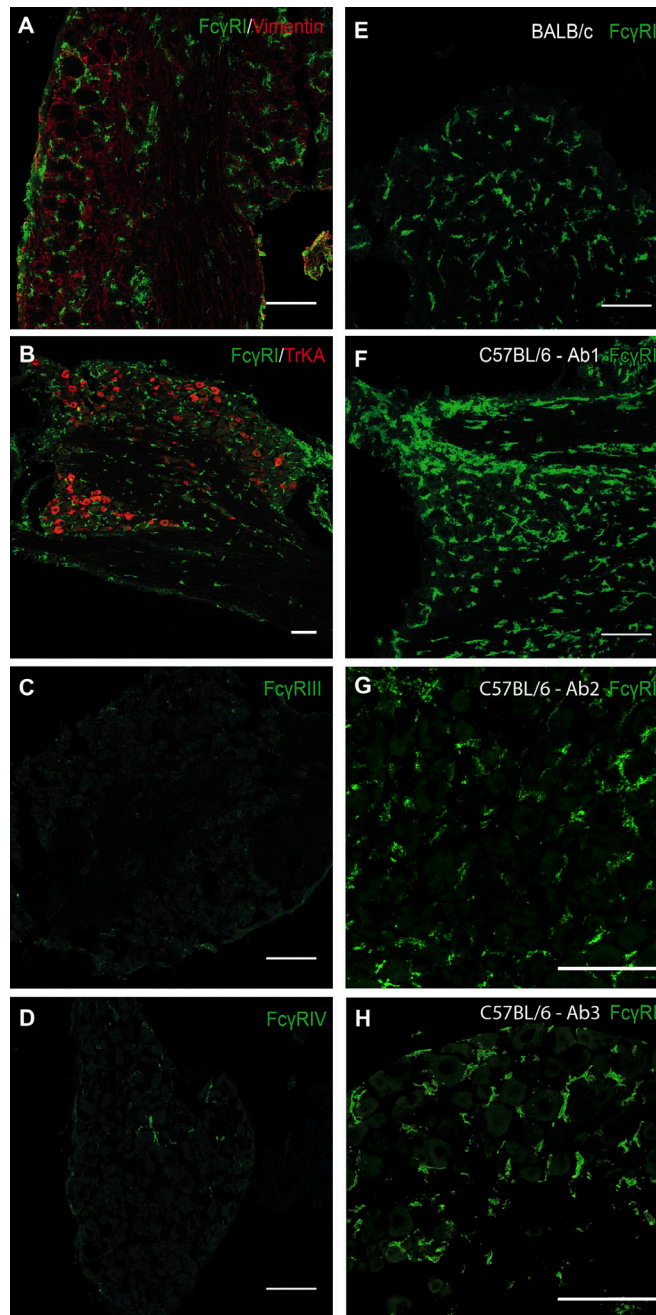

Figure S2. **Fc $\gamma$ RI expression in BALB/c and C57BL/6 mice DRGs and lack of expression of Fc $\gamma$ RIII and Fc $\gamma$ RIV in mouse DRG.** Related to Fig. 5. **(A and B)** IHC shows lack of colocalization between Fc $\gamma$ RI staining and vimentin and TrkA. **(C and D)** No immunoreactivity for Fc $\gamma$ RIII and Fc $\gamma$ RIV was detected in BALB/c mouse DRG. **(E)** Fc $\gamma$ RI immunoreactivity is present in resident macrophages of BALB/c mouse DRG. **(F–H)** Antibodies from three different sources (M.S. Cragg, Sino Biological, and R&D Systems) showed Fc $\gamma$ RI immunoreactivity in resident macrophages in DRGs from C57BL/6 mice. Scale bars represent 100  $\mu$ m.

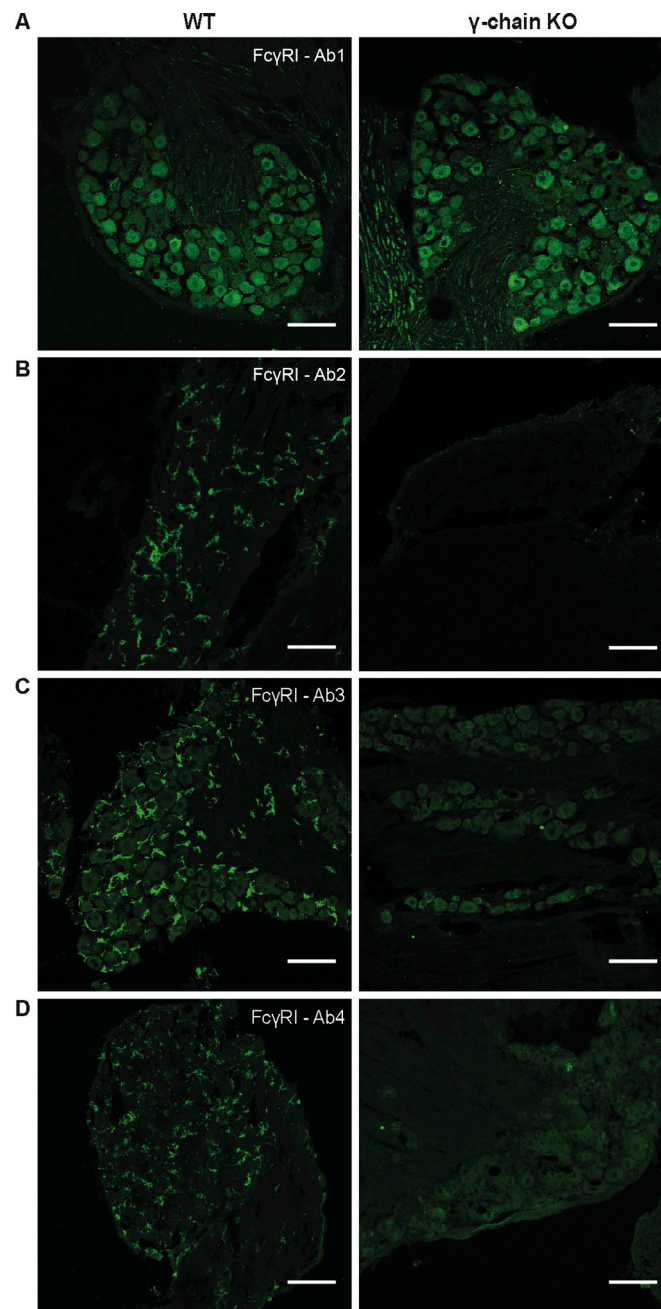

Figure S3. **Specificity control of several anti-Fc $\gamma$ RI antibodies used for IHC in mouse DRG.** Related to Fig. 5. **(A)** Fc $\gamma$ RI immunoreactivity is present in neuronal cell bodies of BALB/c mouse DRG when using an antibody from Santa Cruz Biotechnology, but the signal is retained in DRGs from Fc $\gamma$ -chain<sup>-/-</sup> mice, indicating nonspecific binding. **(B–D)** Antibodies from three different sources (M.S. Cragg, Sino Biological, and R&D Systems) showed Fc $\gamma$ RI immunoreactivity in resident macrophages in BALB/c mouse DRGs, and the signal is absent in DRGs from Fc $\gamma$ -chain<sup>-/-</sup> mice, indicating specific binding. Scale bars represent 100  $\mu$ m.

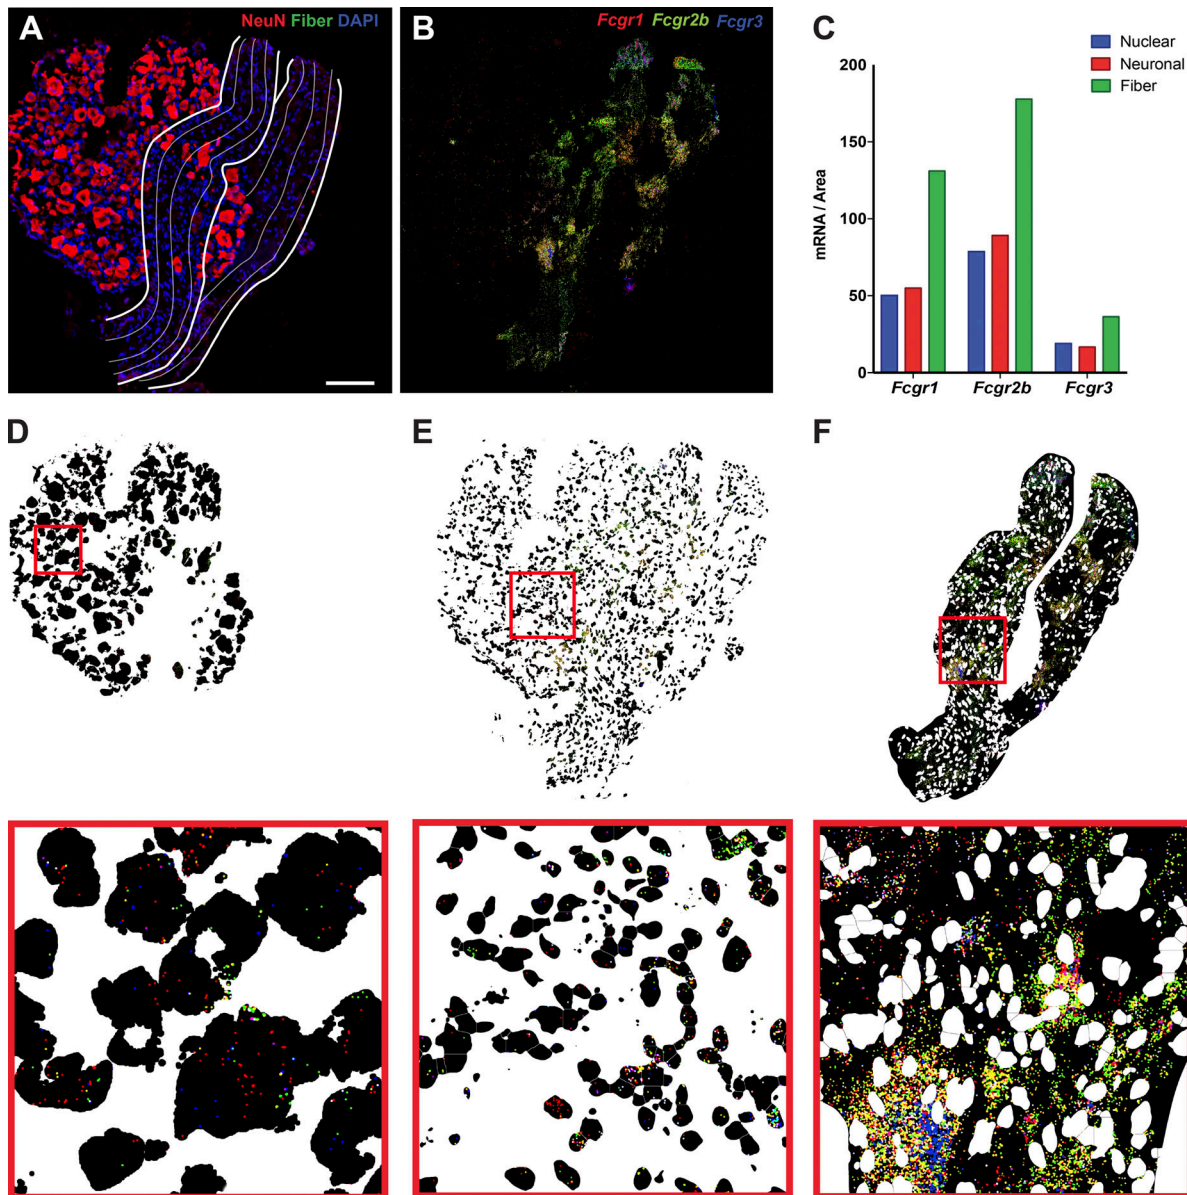

Figure S4. smFISH quantification of *Fcgr1*, *Fcgr2b*, and *Fcgr3* mRNA molecules in neuronal, nuclear, and fiber tract areas of mouse DRGs. Related to Figs. 4 and 5. (A) Representation of neuronal (NeuN), nuclear (DAPI), and fiber tract (nonneuronal and nonnuclear) areas in mouse DRG. (B) smFISH detection of *Fcgr1–3* in mouse DRGs. (C–F) Quantification of *Fcgr1–3* in neuronal, nuclear, and fiber tract areas. *Fcgr1–3* are most expressed in the fiber tracts of mouse DRG. Panels D, E, and F are masked versions of B, representing the neuronal, the nuclear, or the fiber regions of the whole DRG, respectively. Scale bar represents 100  $\mu$ m.
